# Supplementary material
Source: PubMed Central journal article supplement (PMC2525715)
Supplement: 01360.2007_2.pdf [file 01360.2007_2.pdf]

Supplemental Table 2. Correlations with THIP baseline shifts

|                                   | Vrest<br>(mV) | Rin<br>(MΩ)   | Fmax<br>Steady<br>State<br>(Hz) | Fmax<br>Initial<br>(Hz) | Adapt.<br>Ratio<br>- | Spike<br>Width<br>(ms) | Sag-V<br>Slope<br>- | F-I<br>Slope<br>(Hz/pA) | Rheo-<br>base<br>(pA) | Thres-<br>hold<br>(mV) | Spike<br>Height<br>(mV) | Rise<br>Rate<br>(V/s) | Fall<br>Rate<br>(V/s) | AHP<br>(mV) | AHP<br>Diff.<br>(mV) |
|-----------------------------------|---------------|---------------|---------------------------------|-------------------------|----------------------|------------------------|---------------------|-------------------------|-----------------------|------------------------|-------------------------|-----------------------|-----------------------|-------------|----------------------|
| <b>RS</b>                         |               |               |                                 |                         |                      |                        |                     |                         |                       |                        |                         |                       |                       |             |                      |
| <b>Pearson's</b>                  | 0.12          | -0.36         | -0.37                           | -0.38                   | -0.02                | -0.04                  | 0.12                | -0.37                   | -0.25                 | 0.19                   | 0.21                    | 0.02                  | -0.09                 | 0.40        | -0.07                |
| Sig.                              | 0.54          | <b>0.05</b>   | <b>0.04</b>                     | <b>0.03</b>             | 0.92                 | 0.81                   | 0.51                | <b>0.04</b>             | 0.16                  | 0.30                   | 0.25                    | 0.91                  | 0.62                  | <b>0.02</b> | 0.69                 |
| <b>Kendall's</b>                  | -0.05         | -0.28         | -0.30                           | -0.28                   | 0.03                 | -0.27                  | -0.04               | -0.23                   | -0.17                 | -0.13                  | 0.33                    | 0.15                  | 0.09                  | 0.07        | -0.21                |
| Sig.                              | 0.71          | <b>0.03</b>   | <b>0.02</b>                     | <b>0.03</b>             | 0.81                 | <b>0.04</b>            | 0.79                | 0.13                    | 0.17                  | 0.30                   | <b>0.01</b>             | 0.23                  | 0.46                  | 0.59        | 0.09                 |
| <b>Spearman's</b>                 | -0.06         | -0.38         | -0.41                           | -0.41                   | 0.07                 | -0.34                  | -0.06               | -0.27                   | -0.23                 | -0.16                  | 0.43                    | 0.19                  | 0.11                  | 0.10        | -0.26                |
| Sig.                              | 0.73          | <b>0.04</b>   | <b>0.02</b>                     | <b>0.02</b>             | 0.72                 | 0.06                   | 0.75                | 0.13                    | 0.20                  | 0.39                   | <b>0.01</b>             | 0.30                  | 0.56                  | 0.57        | 0.15                 |
| <b>LTS</b>                        |               |               |                                 |                         |                      |                        |                     |                         |                       |                        |                         |                       |                       |             |                      |
| <b>Pearson's</b>                  | -0.34         | -0.18         | -0.26                           | 0.10                    | -0.40                | 0.02                   | 0.23                | -0.17                   | -0.22                 | -0.09                  | 0.26                    | 0.22                  | 0.22                  | -0.37       | 0.11                 |
| Sig.                              | 0.16          | 0.47          | 0.21                            | 0.65                    | <b>0.05</b>          | 0.94                   | 0.29                | 0.45                    | 0.31                  | 0.67                   | 0.22                    | 0.30                  | 0.31                  | 0.08        | 0.60                 |
| <b>Kendall's</b>                  | -0.18         | -0.23         | -0.16                           | 0.01                    | -0.40                | -0.02                  | 0.19                | -0.19                   | -0.02                 | 0.01                   | 0.26                    | -0.08                 | -0.09                 | -0.23       | 0.05                 |
| Sig.                              | 0.29          | 0.16          | 0.26                            | 0.92                    | <b>0.01</b>          | 0.90                   | 0.24                | 0.26                    | 0.89                  | 0.92                   | 0.07                    | 0.59                  | 0.52                  | 0.12        | 0.75                 |
| <b>Spearman's</b>                 | -0.27         | -0.27         | -0.19                           | 0.11                    | -0.47                | -0.04                  | 0.21                | -0.23                   | -0.01                 | 0.00                   | 0.34                    | -0.10                 | -0.10                 | -0.39       | 0.07                 |
| Sig.                              | 0.27          | 0.27          | 0.39                            | 0.62                    | <b>0.02</b>          | 0.86                   | 0.32                | 0.28                    | 0.95                  | 1.00                   | 0.11                    | 0.63                  | 0.63                  | 0.06        | 0.74                 |
| <b>FS</b>                         |               |               |                                 |                         |                      |                        |                     |                         |                       |                        |                         |                       |                       |             |                      |
| <b>Pearson's</b>                  | 0.37          | -0.56         | 0.56                            | 0.41                    | 0.34                 | -0.71                  | 0.08                | -0.30                   | -0.06                 | -0.12                  | 0.43                    | 0.55                  | 0.60                  | 0.49        | 0.38                 |
| Sig.                              | 0.22          | <b>0.05</b>   | <b>0.04</b>                     | 0.15                    | 0.24                 | <b>0.005</b>           | 0.79                | 0.29                    | 0.84                  | 0.67                   | 0.13                    | <b>0.04</b>           | <b>0.02</b>           | 0.08        | 0.17                 |
| <b>Kendall's</b>                  | 0.03          | -0.31         | 0.34                            | 0.42                    | 0.16                 | -0.57                  | -0.18               | -0.17                   | 0.01                  | -0.35                  | 0.27                    | 0.49                  | 0.43                  | 0.31        | 0.17                 |
| Sig.                              | 0.90          | 0.14          | 0.09                            | <b>0.04</b>             | 0.50                 | <b>0.009</b>           | 0.40                | 0.44                    | 0.96                  | 0.08                   | 0.17                    | <b>0.01</b>           | <b>0.03</b>           | 0.12        | 0.41                 |
| <b>Spearman's</b>                 | 0.00          | -0.51         | 0.37                            | 0.47                    | 0.19                 | -0.70                  | -0.20               | -0.26                   | -0.01                 | -0.45                  | 0.35                    | 0.67                  | 0.62                  | 0.47        | 0.22                 |
| Sig.                              | 1.00          | 0.07          | 0.19                            | 0.09                    | 0.52                 | <b>0.005</b>           | 0.50                | 0.37                    | 0.97                  | 0.11                   | 0.21                    | <b>0.01</b>           | <b>0.02</b>           | 0.09        | 0.45                 |
| <b>All Cell Types (collapsed)</b> |               |               |                                 |                         |                      |                        |                     |                         |                       |                        |                         |                       |                       |             |                      |
| <b>Pearson's</b>                  | 0.04          | -0.39         | 0.21                            | 0.12                    | 0.10                 | -0.35                  | 0.07                | 0.00                    | -0.12                 | -0.24                  | 0.30                    | 0.33                  | 0.36                  | 0.12        | -0.31                |
| Sig.                              | 0.785         | <b>0.002</b>  | 0.079                           | 0.325                   | 0.391                | <b>0.003</b>           | 0.546               | 0.977                   | 0.308                 | <b>0.041</b>           | <b>0.013</b>            | <b>0.006</b>          | <b>0.002</b>          | 0.306       | <b>0.010</b>         |
| <b>Kendall's</b>                  | 0.06          | -0.31         | 0.08                            | 0.06                    | 0.13                 | -0.36                  | -0.02               | 0.08                    | 0.02                  | -0.27                  | 0.25                    | 0.22                  | 0.23                  | 0.07        | -0.33                |
| Sig.                              | 0.531         | <b>0.0004</b> | 0.359                           | 0.478                   | 0.157                | <b>0.00002</b>         | 0.855               | 0.419                   | 0.848                 | <b>0.001</b>           | <b>0.002</b>            | <b>0.006</b>          | <b>0.005</b>          | 0.414       | <b>0.0001</b>        |
| <b>Spearman's</b>                 | 0.08          | -0.43         | 0.12                            | 0.09                    | 0.17                 | -0.49                  | -0.03               | 0.09                    | 0.02                  | -0.36                  | 0.37                    | 0.31                  | 0.33                  | 0.10        | -0.46                |
| Sig.                              | 0.547         | <b>0.0005</b> | 0.314                           | 0.454                   | 0.170                | <b>0.00001</b>         | 0.790               | 0.458                   | 0.876                 | <b>0.002</b>           | <b>0.002</b>            | <b>0.009</b>          | <b>0.006</b>          | 0.406       | <b>0.0001</b>        |

Supplemental Table 2. Correlations of cell parameters with THIP-induced baseline shifts by cell type and collapsed across all cell. Pearson's, Kendall's tau, and Spearman's rho correlation coefficients are provided. P values  $\leq 0.05$  are bolded. All significance values are two-tailed. A description of each cell parameter is provided in the Methods section, and values for each by cell group are provided in Supplemental Table 1.
